# Supplementary material for: Fully biomass-derived vitrimeric material with water-mediated recyclability and monomer recovery
Source: Royal Society of Chemistry journal article supplement (doi:10.1039/d2gc01556k), 2022-01-01
Supplement: d2gc01556k1.pdf [file d2gc01556k1.pdf]

## **Supporting Information**

### **Fully Biomass-Derived Vitrimeric Material with Water-Mediated Recyclability and Monomer Recovery**

Zhuang Mao Png<sup>a,b,†,\*</sup>, Jie Zheng<sup>a,b,†</sup>, Sirin Kamarulzaman<sup>a,†</sup>, Sheng Wang<sup>a,b</sup>, Zibiao Li<sup>a,b,c,\*</sup>, Shermin S. Goh<sup>a,\*</sup>

<sup>a</sup> Institute of Materials Research and Engineering (IMRE), A\*STAR (Agency for Science, Technology and Research), 2 Fusionopolis Way, Innovis #08-03, 138634, Singapore. Email: [lizb@imre.a-star.edu.sg](mailto:lizb@imre.a-star.edu.sg); [gohsms@imre.a-star.edu.sg](mailto:gohsms@imre.a-star.edu.sg)

<sup>b</sup> Institute of Sustainability for Chemicals, Energy and Environment (ISCE2), A\*STAR, 2 Fusionopolis Way, Innovis #08-03, 138634, Singapore. Email: [png\\_zhuang\\_mao@isce2.a-star.edu.sg](mailto:png_zhuang_mao@isce2.a-star.edu.sg)

<sup>c</sup> Department of Materials Science and Engineering, National University of Singapore, 9 Engineering Drive 1, 117576, Singapore.

### Small molecule NMR model studies of acetal exchange

All small molecule studies were performed in an NMR tube with furfural-acetyl (0.2 mmol, 1 eq), sorbitol, (0.2 mmol, 1 eq), and 1,3,5-trimethoxybenzene (0.06 mmol, 0.3 eq) as an internal standard in DMSO- $d_6$  (0.55 mL).

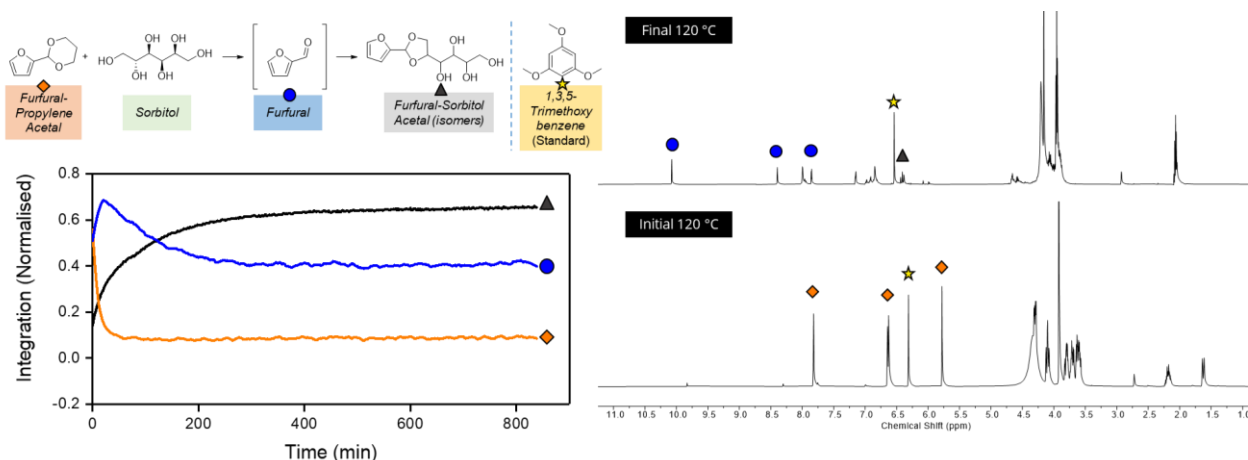

**Figure S1:** Reaction profile of Furfural-propylene acetal with sorbitol, with TsOH catalyst (5 mol%) at 120 °C.

### Small molecule GC-MS model studies of acetal exchange

Furfural-ethylene acetal (1.2 mmol, 1 eq), sorbitol (1.2 mmol, 1 eq), and 1,3,5-trimethoxybenzene (0.36 mmol, 0.3 eq) as an internal standard was stirred in DMSO (3.3mL) at 120°C. GC-MS samples of the reaction mixture was taken every 3 hours and quenched by cooling. Trace furancarboxylic acid, together with acetal exchange products, was found after 9h.

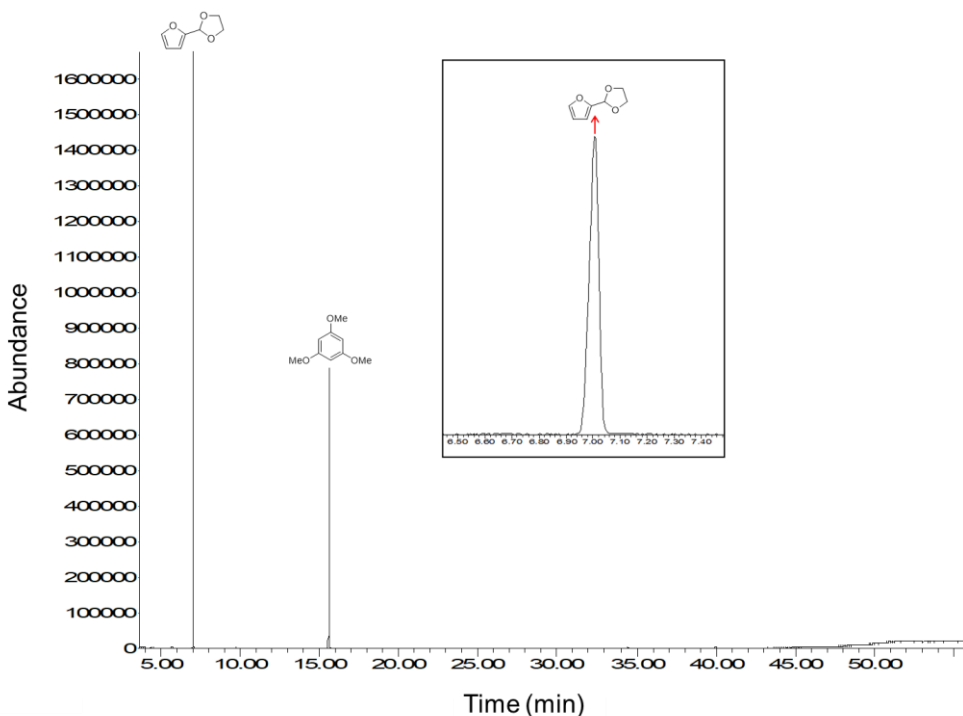

**Figure S2a:** GCMS spectrum of uncatalyzed acetal exchange at 0 h.

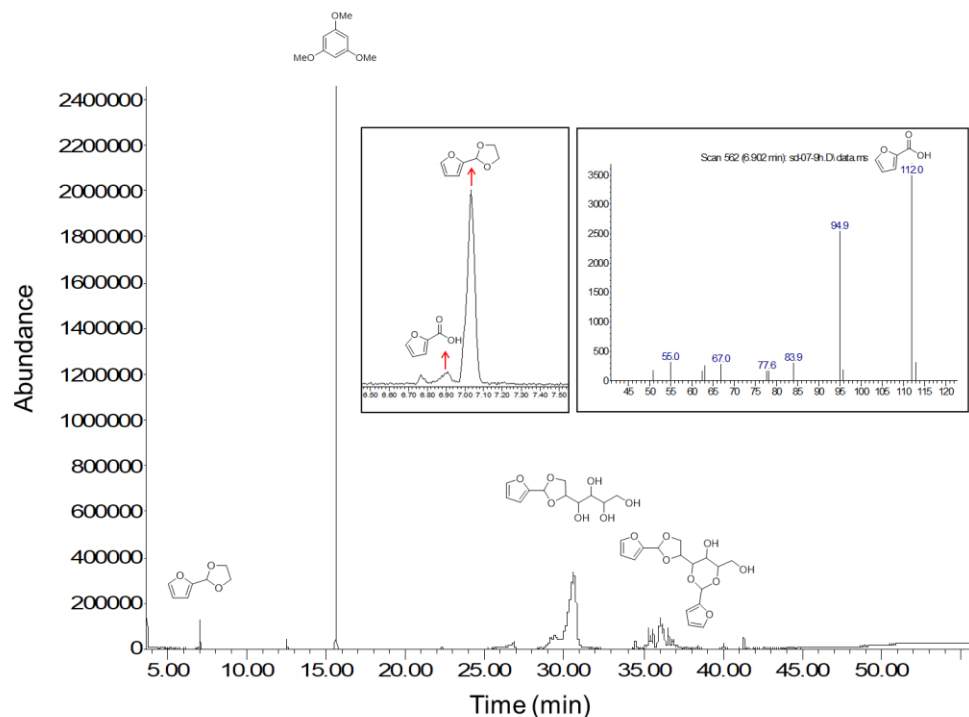

**Figure S2b:** GCMS spectrum of uncatalyzed acetal exchange at 9 h.

### Synthesis and Characterization of polymer

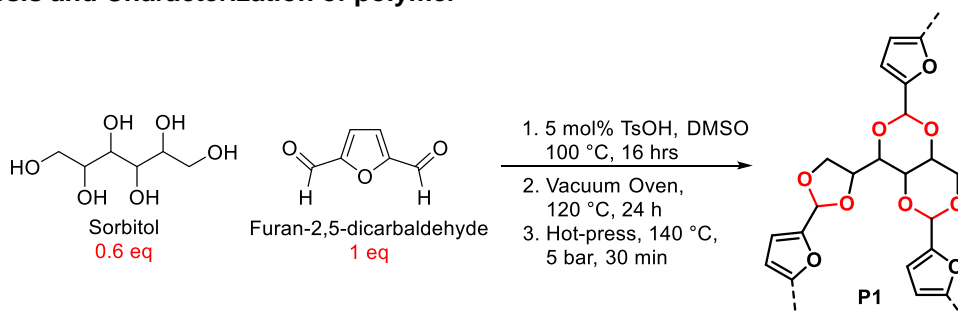

**Scheme S1.** Synthesis of **P1** from furan-2,5-dicarbaldehyde and sorbitol

To a Teflon beaker with stirrer bar was added furan-2,5-dicarbaldehyde (6.2 g, 50 mmol, 1 eq), sorbitol (5.45 g, 30 mmol, 0.6 eq) and DMSO (10 mL). The mixture was then heated at 100 °C for 16 hours under steady stream of nitrogen. The gel-like mixture was then transferred to a Teflon dish and further cured in a vacuum oven at 120 °C overnight. The sample was obtained as a brown solid (**P1**, 9.44g, 85%).

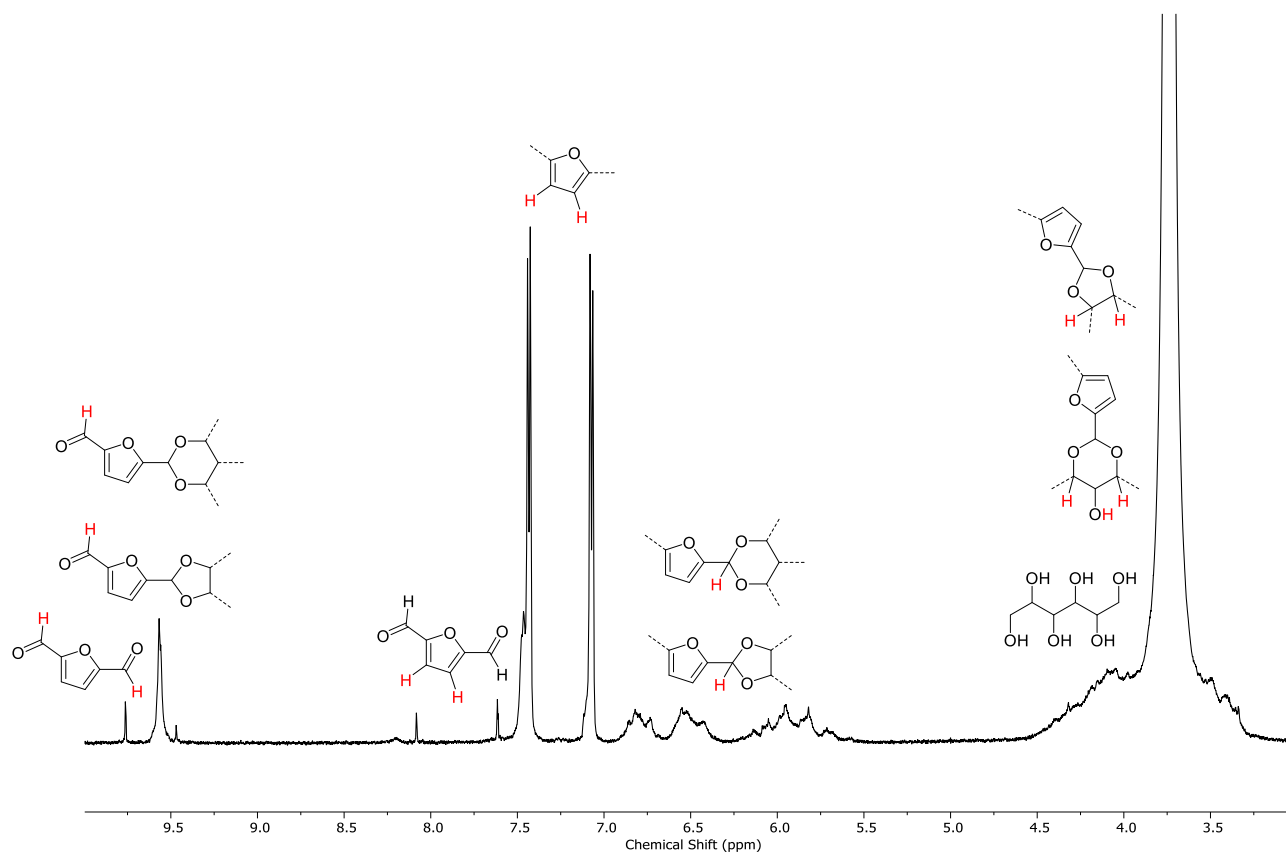

**Figure S3:** NMR of pre-cured oligomers of P1.

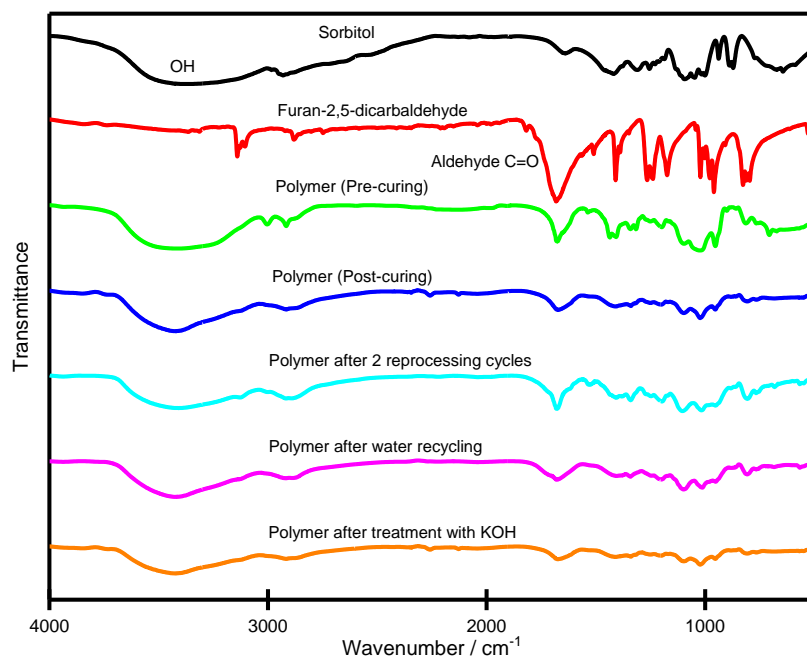

**Figure S4:** FTIR of the starting materials, the polymer network pre and post curing, as well as after 2 reprocessing cycles, water-mediated recycling, and treatment with KOH.

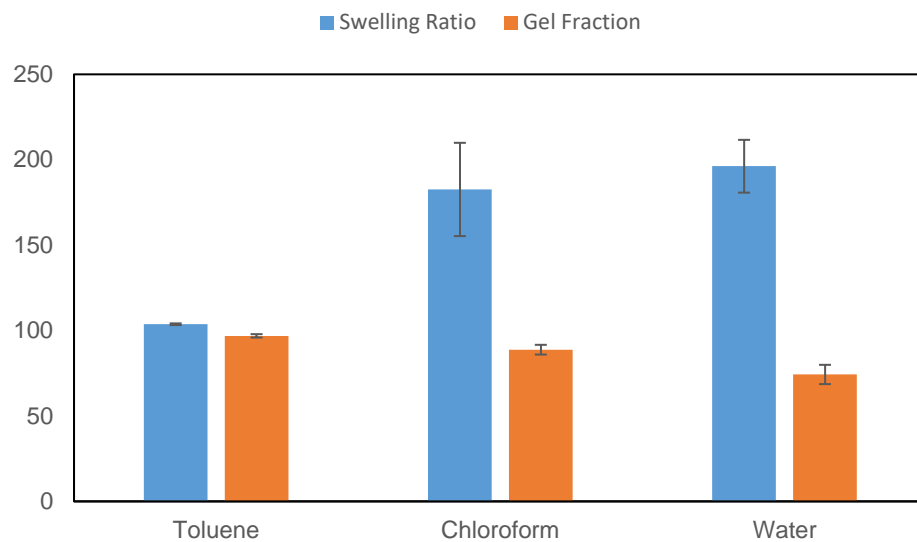

**Figure S5:** Swelling ratio and gel fraction of **P1** in toluene, chloroform, and water.

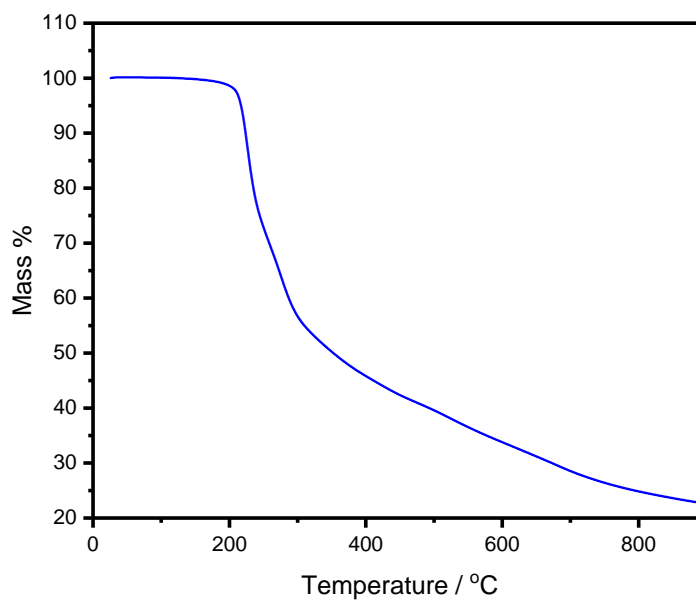

**Figure S6:** TGA of polymer **P1**.  $T_{d5\%}$  was found to be 216 °C.
